# Supplementary material
Source: HighWire-hosted journal article supplement (http://www.cmaj.ca/highwire/filestream/76554/field_highwire_adjunct_files/1/Obesity-visual-online-F.pdf)
Supplement: Obesity-visual-online-F.pdf [file Obesity-visual-online-F.pdf]

# L'OBÉSITÉ CHEZ L'ADULTE

## Guide de pratique clinique

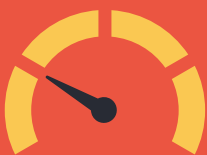

**L'IMC N'EST PAS UN OUTIL PRÉCIS POUR DÉPISTER LES COMPLICATIONS LIÉES À L'OBÉSITÉ**

**L'obésité** est une maladie chronique complexe caractérisée par une accumulation anormale ou excessive de graisses corporelles qui est nuisible à la santé

Effets :

- ▼ santé
- ▼ qualité de vie
- ▼ espérance de vie

Les personnes vivant avec l'obésité font l'objet de préjugés et de stigmatisation en lien avec leur poids

→ Complications et mortalité accrues indépendamment du poids ou de l'IMC

**Préjugés liés au poids** Croire que les personnes vivant avec l'obésité manquent de volonté ou ne coopèrent pas

**Stigmatisation** Agir en fonction de croyances liées au poids

## PARCOURS DU PATIENT ET GESTION DE L'OBÉSITÉ

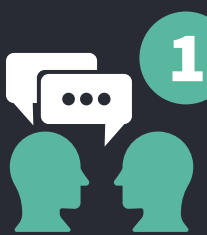

1

### DEMANDER L'AUTORISATION

« Seriez-vous d'accord pour que nous discutons de votre poids? »

#### Demander l'autorisation

- témoigne de la compassion et de l'empathie
- renforce le lien de confiance patient-professionnel de la santé

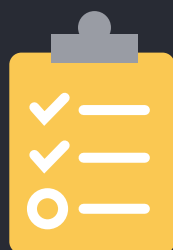

3

### OFFRIR DES CONSEILS DE GESTION DE L'OBÉSITÉ

#### Thérapie nutritionnelle

- Conseils personnalisés par une diététiste agréée, axés sur des choix alimentaires santé et la thérapie nutritionnelle fondée sur des données probantes

#### Exercice

- De 30 à 60 minutes d'exercice d'intensité modérée à vigoureuse la plupart des jours de la semaine

2

### TENIR COMPTE DU VÉCU DU PATIENT

- Objectifs qui comptent pour le patient
- Classification de l'obésité (IMC et tour de taille)
- Gravité de la maladie Système de classification de l'obésité EOSS (Edmonton Obesity Staging System)

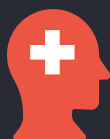

#### Approche psychologique

- Thérapie cognitive favorisant un changement de comportements
- Gestion du sommeil, du temps, et du stress
- Psychothérapie selon le cas

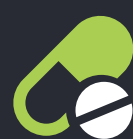

#### Approche pharmacologique

- Pour favoriser la perte de poids et son maintien

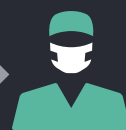

#### Chirurgie bariatrique

- Discussion chirurgien-patient

**S'attaquer aux causes profondes du gain pondéral est la base d'une saine gestion de l'obésité**

**Se concentrer sur des paramètres de santé centrés sur le patient**

Contre

**Perte de poids seulement**

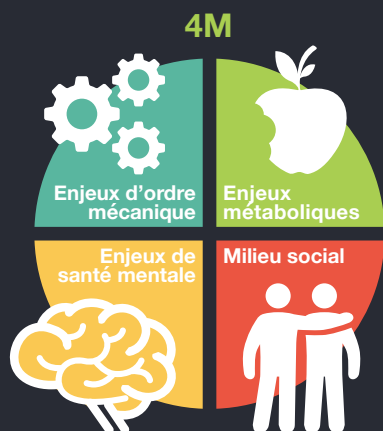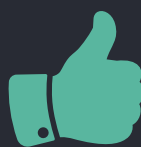

4

### FIXER ENSEMBLE LES OBJECTIFS

Collaborer à un plan d'action personnalisé réaliste

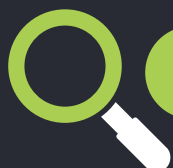

5

### AFFRONTER LES FACTEURS CONTRIBUTIFS ET AUTRES OBSTACLES
